# Supplementary material for: High performing solution-coated electrolyte-gated organic field-effect transistors for aqueous media operation
Source: PubMed Central journal article supplement (PMC5177926; doi:10.1038/srep39623), 2016-12-22
Supplement: srep39623-s1.pdf [file srep39623-s1.pdf]

## Supporting Information

### High performing solution-coated electrolyte-gated organic field-effect transistors for aqueous media operation

*Qiaoming Zhang, Francesca Leonardi, Stefano Casalini, Inés Temiño and Marta Mas-Torrent\**

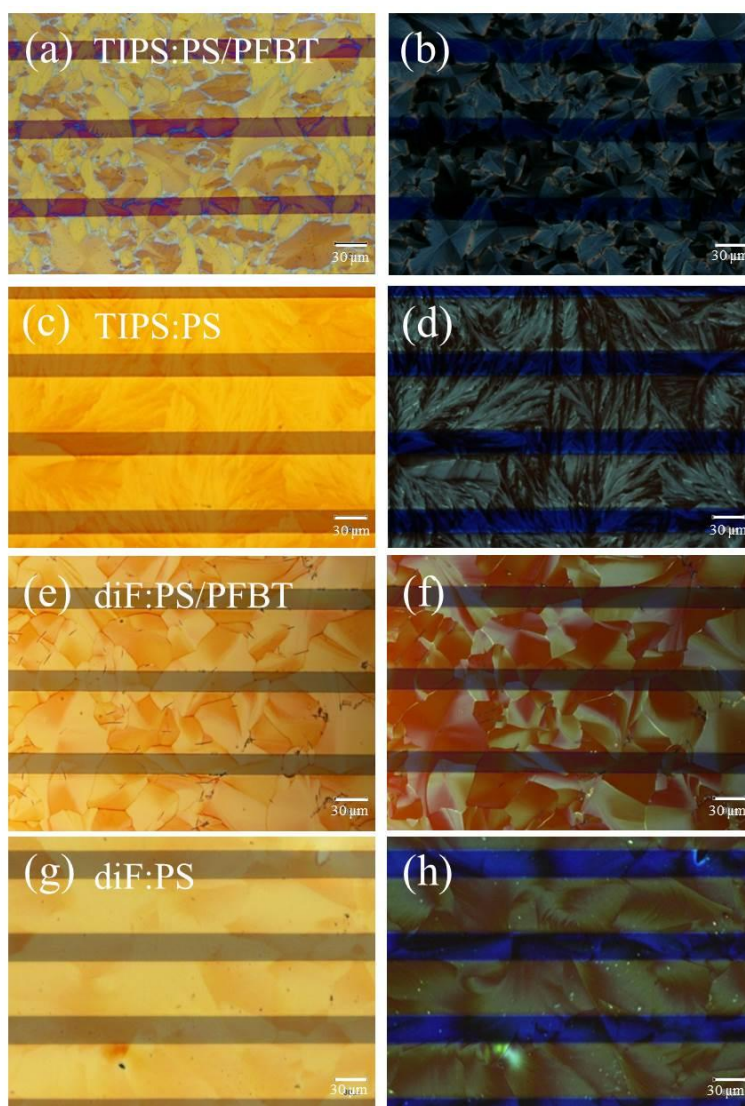

Figure S1 The optical microscopy images acquired with a cross polarizer. On the left, polarizer/analyzer =  $0^\circ$ . On the right, polarizer/analyzer =  $90^\circ$ .

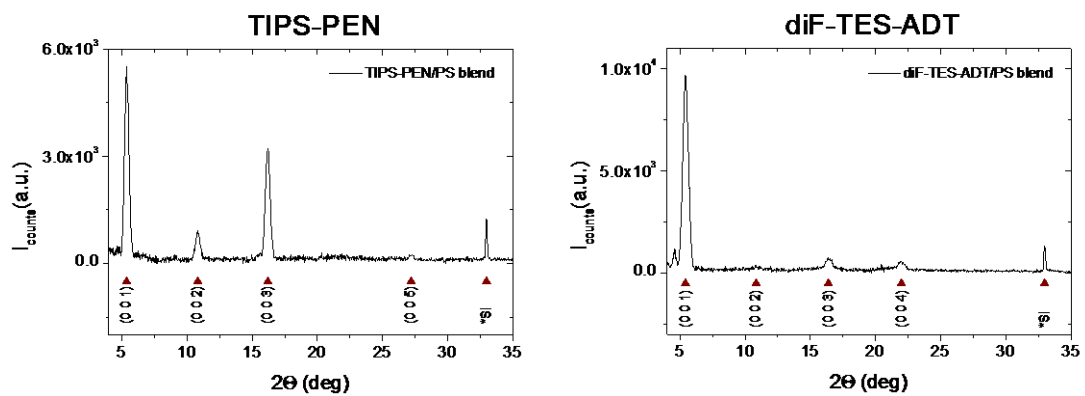

Figure S2 X ray diffractograms of thin films based on TIPS-PEN and diF-TES-ADT. The peak placed approximately at  $33^\circ$  is due to the silicon substrate reflection.

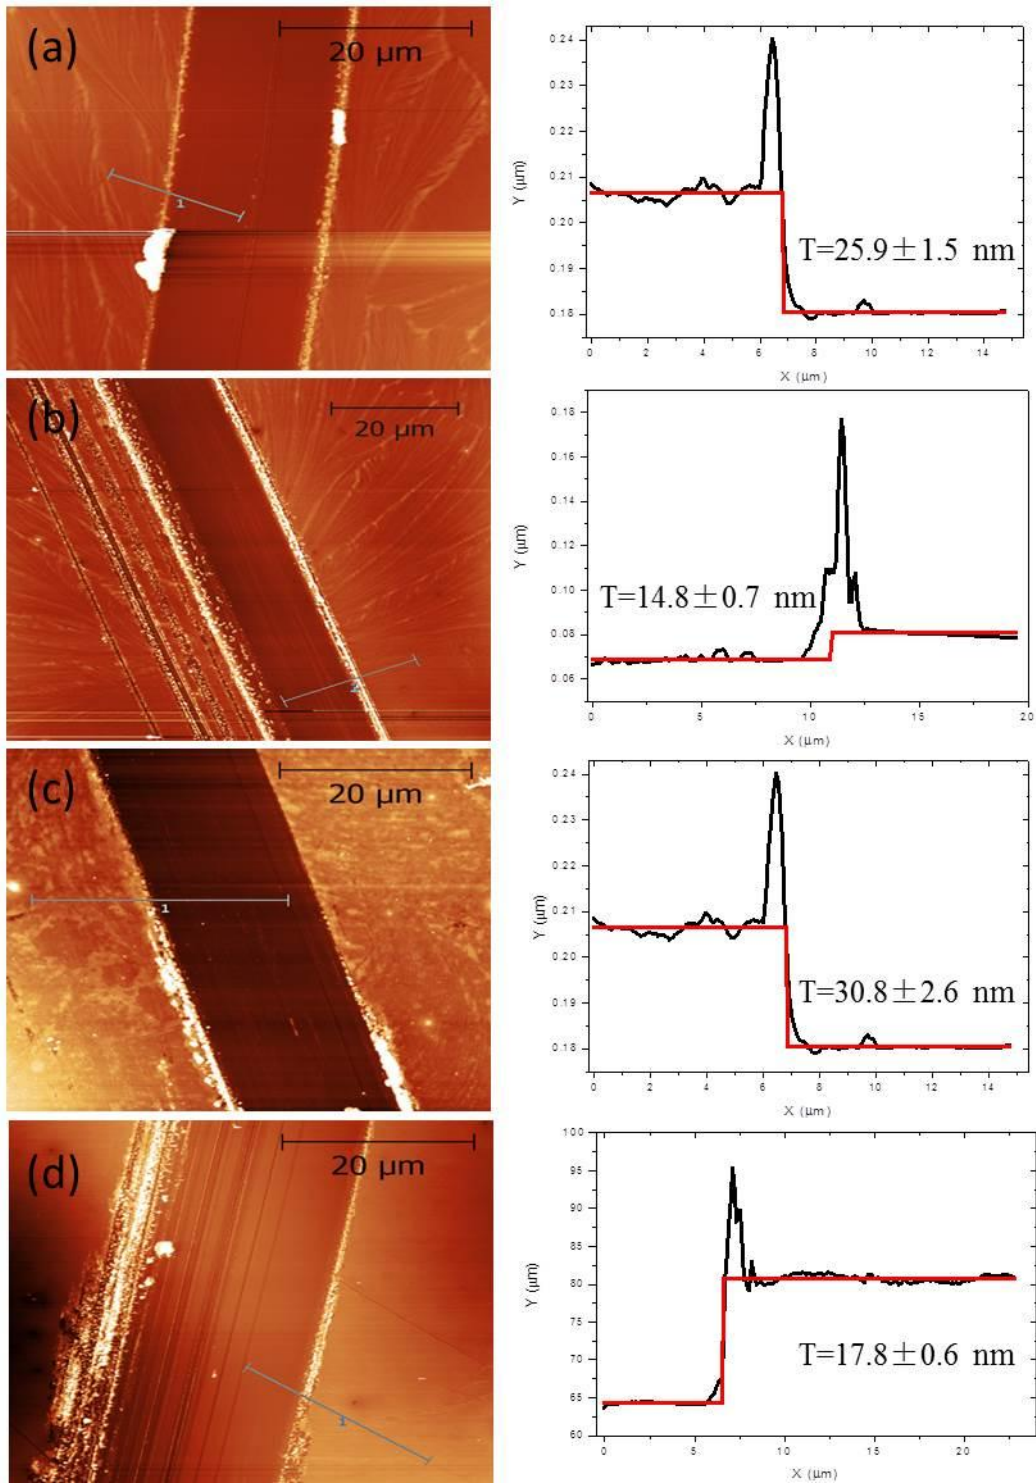

Figure S3 AFM profiles and their corresponding 2D fitting of a) TIPS:PS/PFBT, b) TIPS:PS, c) diF:PS/PFBT and d) diF:PS devices.

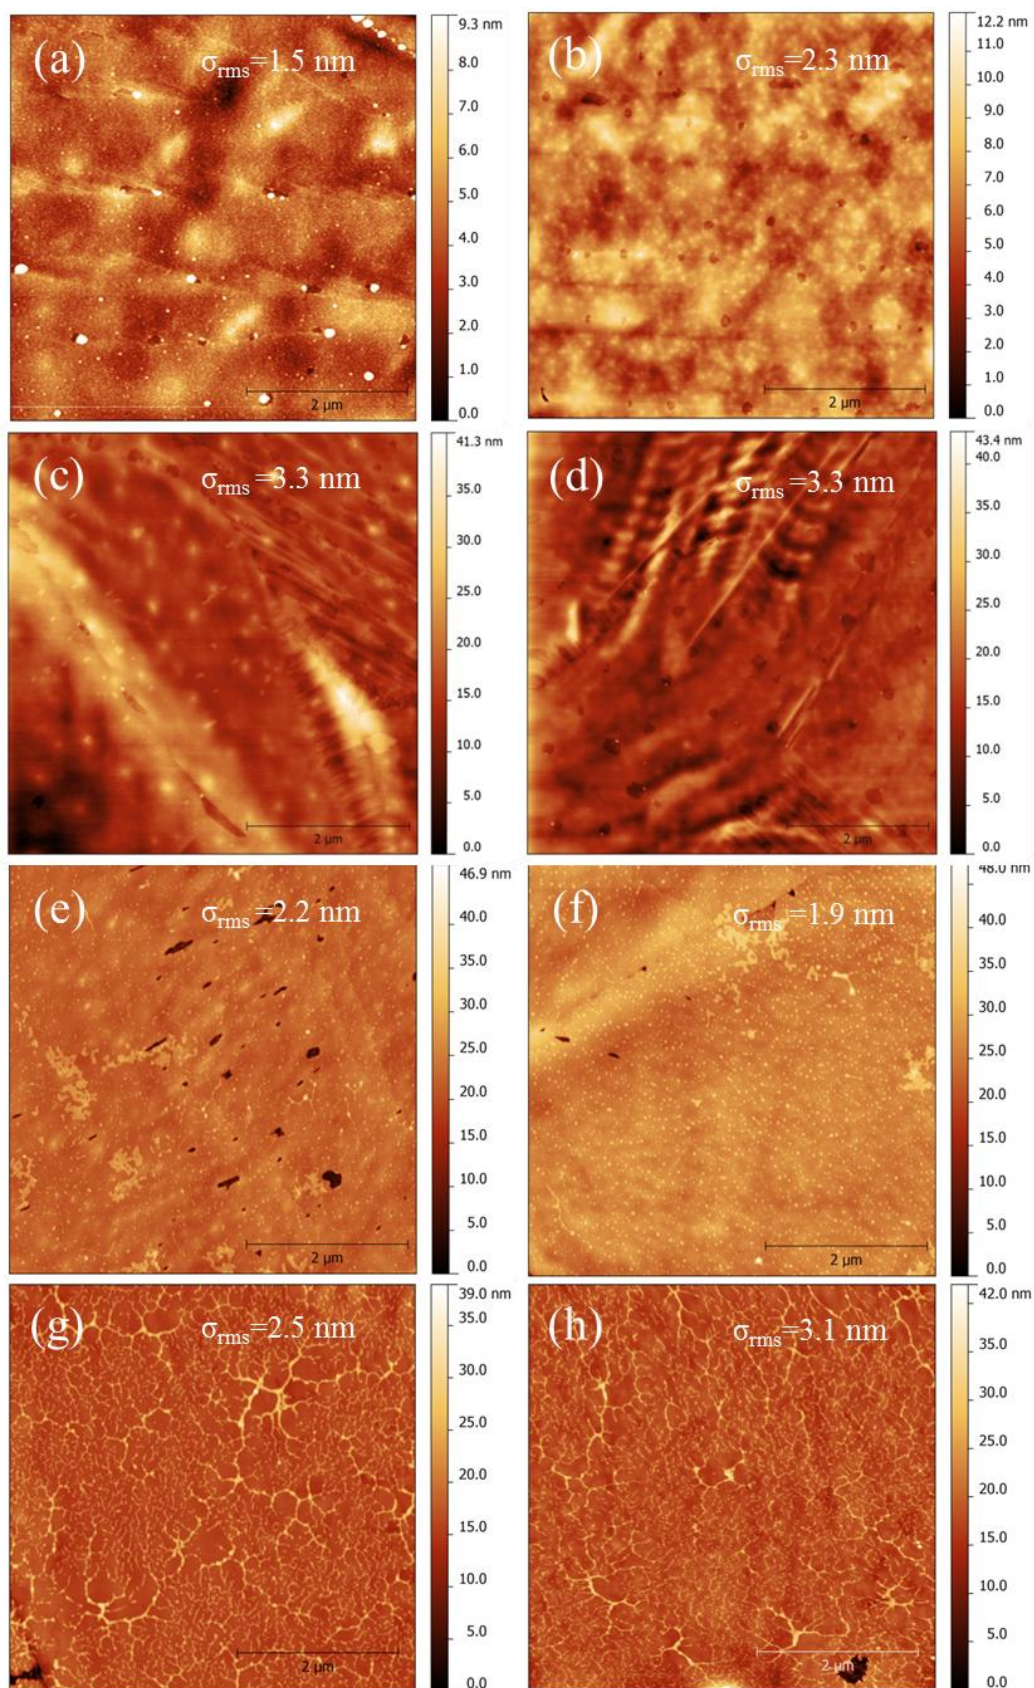

Figure S4 AFM images ( $5 \times 5 \mu\text{m}^2$ ) of a) b) TIPS:PS/PFBT, c) d) TIPS:PS, e) f) diF:PS/PFBT and g) h) diF:PS devices. The left column images were acquired on the channel region, while the ones on the right on the electrodes region.

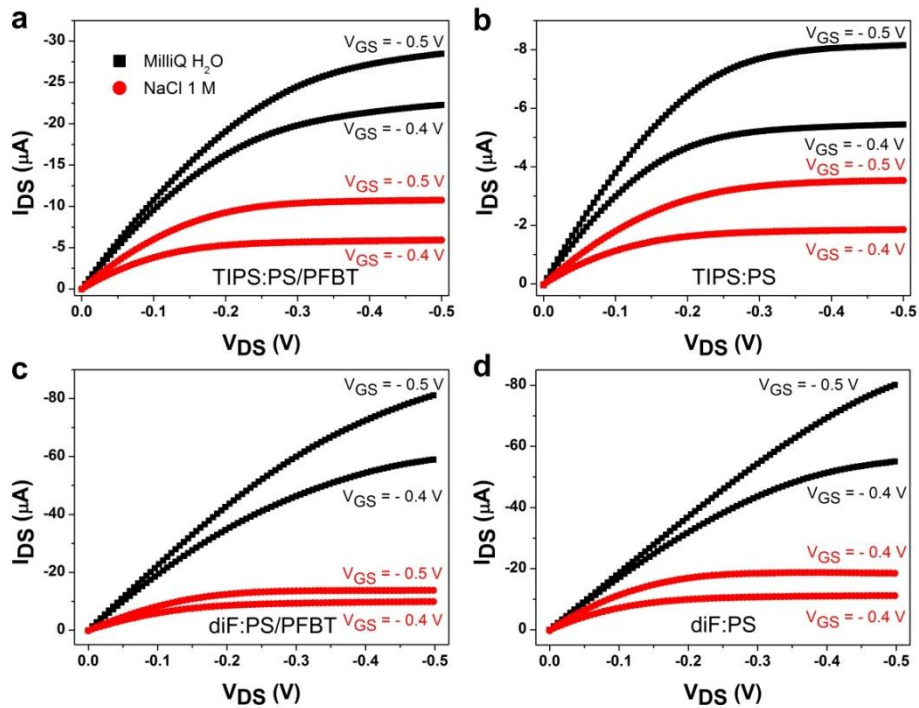

Figure S5 Output characteristics of a) TIPS:PS/PFBT, b) TIPS:PS, c) diF:PS/PFBT and d) diF:PS recorded in MilliQ H<sub>2</sub>O (black curves) and NaCl 1M (red curves)

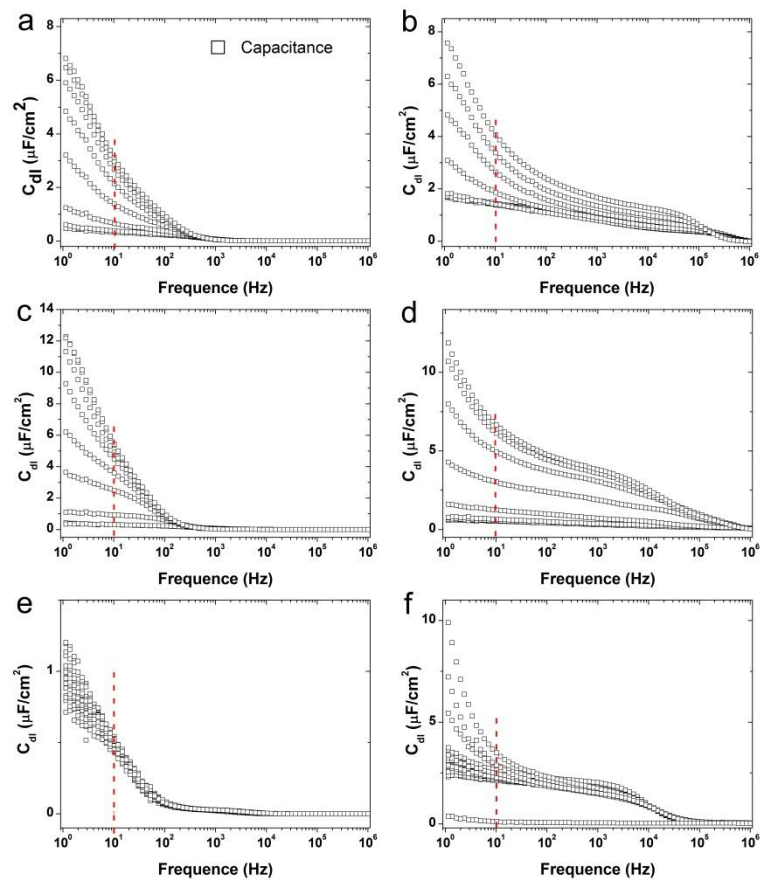

Figure S6 EIS measurements of TIPS:PS/PFBT device recorded at different DC voltages (from 0.1V to -0.5 V with a pace of -0.1V) under a) MilliQ H<sub>2</sub>O and b) NaCl 1 M. EIS measurements of diF:PS/PFBT device in c) MilliQ H<sub>2</sub>O and d) NaCl 1 M. EIS measurements of the uncoated device in e) MilliQ H<sub>2</sub>O and f) NaCl 1 M.

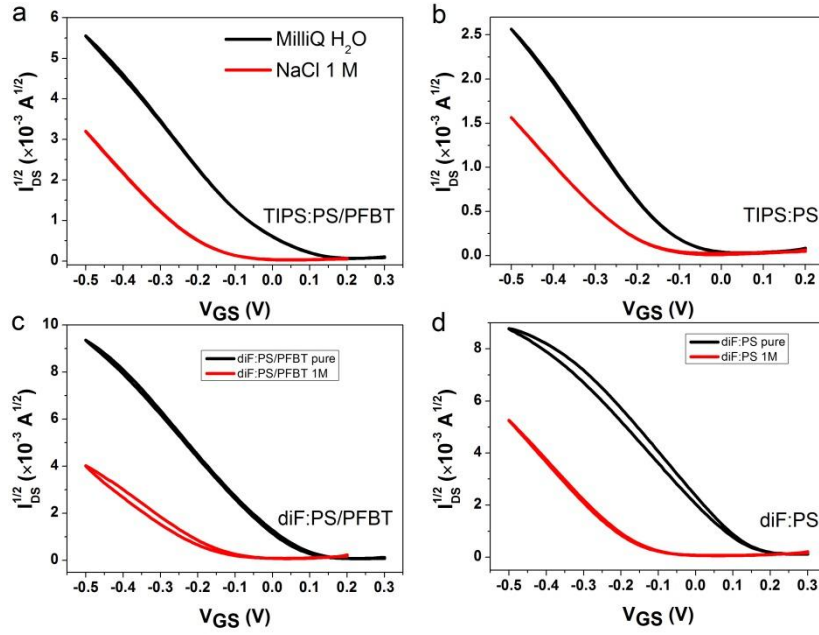

Figure S7 I-V transfer characteristics of a) TIPS:PS/PFBT, b) TIPS:PS, c) diF:PS/PFBT, d) diF:PS recorded in MilliQ H<sub>2</sub>O and NaCl 1M.

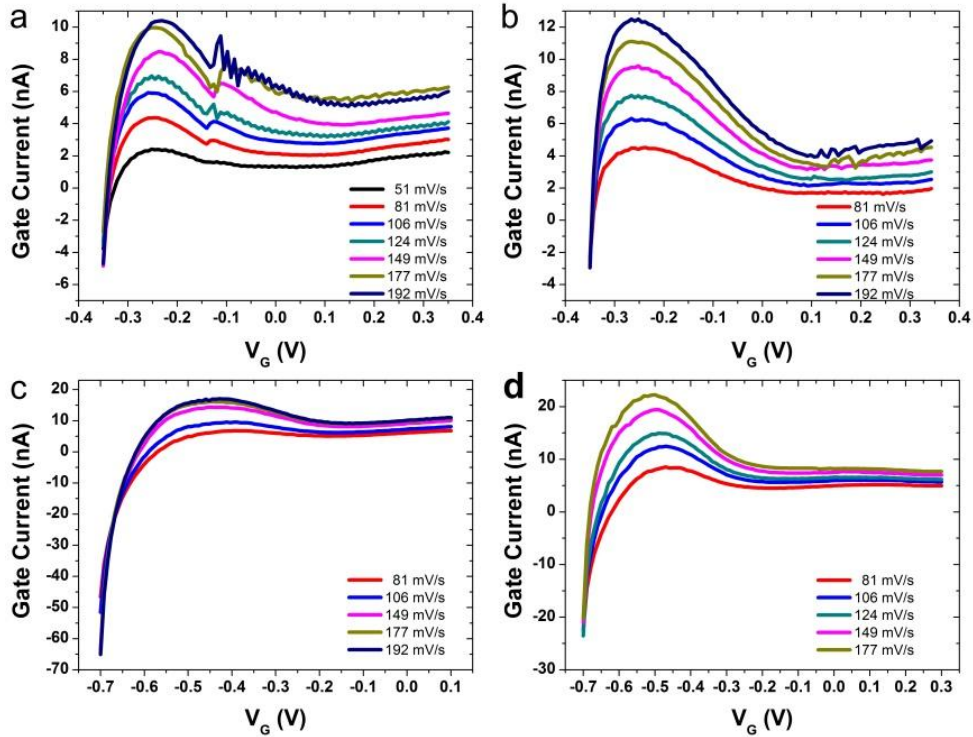

Figure S8 Overlay of displacement current measurements at different scan rates of TIPS:PS/PFBT in a) MilliQ H<sub>2</sub>O and b) NaCl 1 M. c) and d) The same results of DCM for diF:PS/PFBT devices under MilliQ H<sub>2</sub>O and NaCl 1 M.

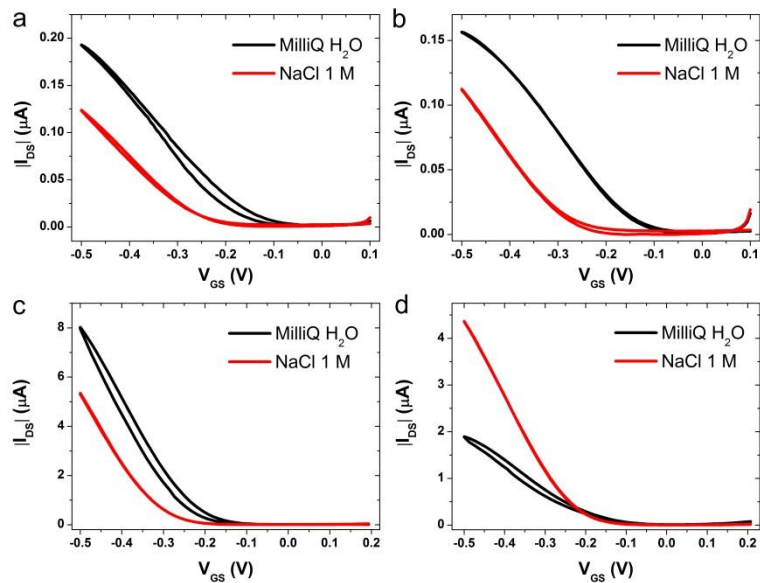

Figure S9 I-V transfer characteristics ( $V_{DS} = -0.4$  V) of a) TIPS/PFBT, b) TIPS, c) diF/PFBT and d) diF devices.

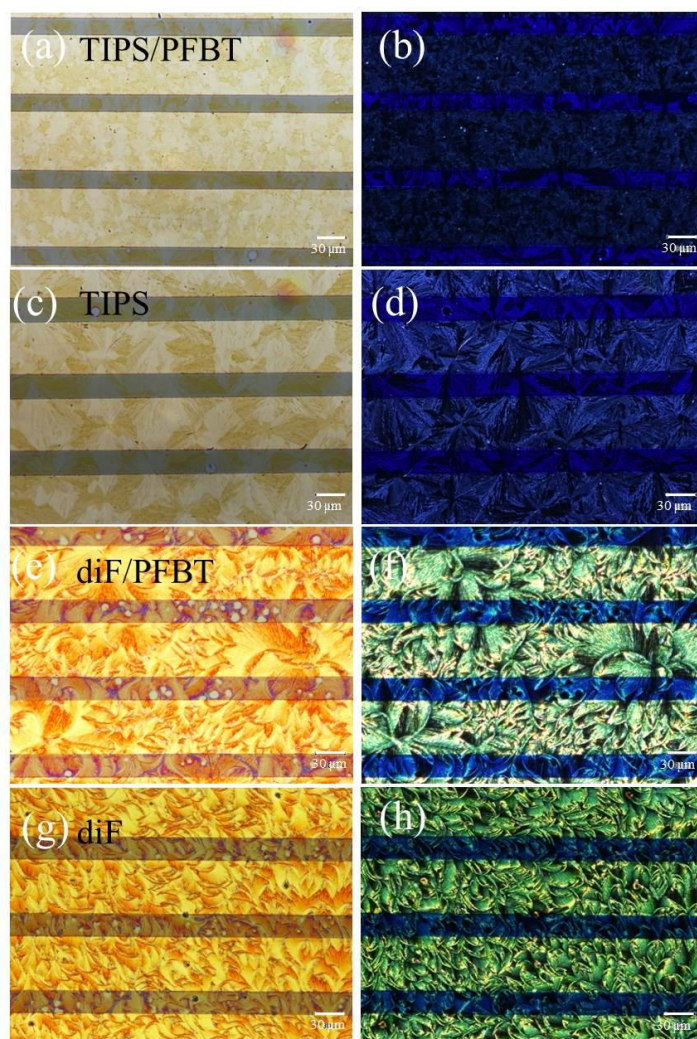

Figure S10 Optical microscopy images acquired with a cross polarizer. On the left, polarizer/analyzer =  $0^\circ$ . On the right, polarizer/analyzer =  $90^\circ$ .

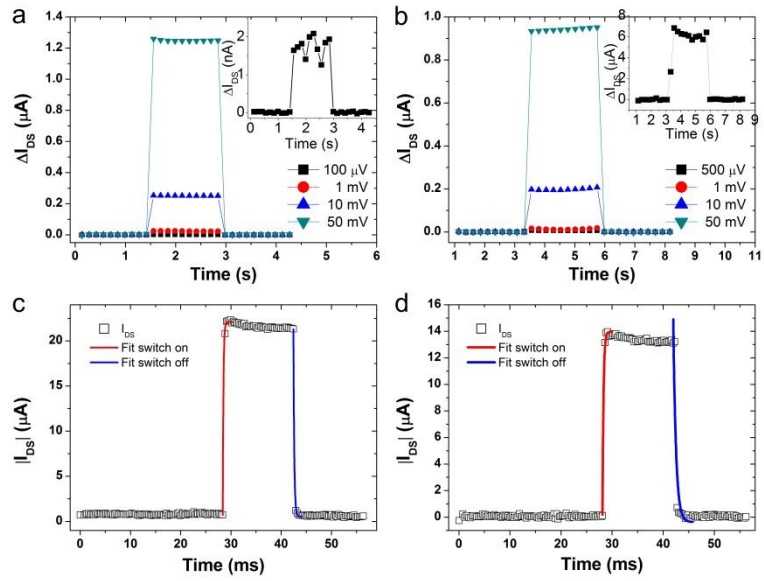

Figure S11 Potentiometric sensitivity of a) TIPS:PS/PFBT and b) diF:PS/PFBT devices. The different  $V_{GS}$  steps are listed in the corresponding graph. Switching speed response of c) TIPS:PS/PFBT and d) diF:PS/PFBT devices. All the measurements are recorded in NaCl 1M at  $V_{DS} = -0.4$  V.

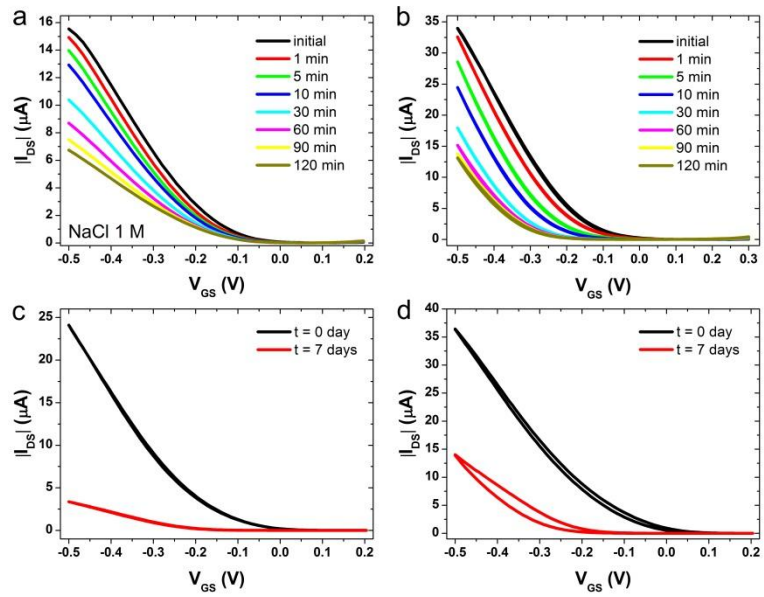

Figure S12 Bias stress experiment of a) TIPS:PS/PFBT and b) diF:PS/PFBT devices. Shelf-stability of our EGOFETs recorded at first and seventh day: c) TIPS:PS/PFBT and d) diF:PS/PFBT devices. All the measurements were performed in NaCl 1 M in saturation regime ( $V_{DS} = -0.4$  V).



Table S1 Values of capacitance extracted by DCM and EIS.

|              | Capacitance ( $\mu\text{F}/\text{cm}^2$ ) |          | Capacitance ( $\mu\text{F}/\text{cm}^2$ ) |          |
|--------------|-------------------------------------------|----------|-------------------------------------------|----------|
|              | (Method: DCM)                             |          | (Method: EIS)                             |          |
|              | MilliQ H <sub>2</sub> O                   | NaCl 1 M | MilliQ H <sub>2</sub> O                   | NaCl 1 M |
| TIPS:PS/PFBT | 2.6                                       | 3.4      | 2.9                                       | 3.3      |
| diF:PS/PFBT  | 4.5                                       | 7        | 5.3                                       | 6.1      |

Table S2 The degradation speeds for *in-situ* current monitoring and shelf-stability in MilliQ H<sub>2</sub>O and NaCl 1 M solution.

|             | Current monitoring (%/hour) |          | Shelf stability(%/day)  |          |
|-------------|-----------------------------|----------|-------------------------|----------|
|             | MilliQ H <sub>2</sub> O     | NaCl 1 M | MilliQ H <sub>2</sub> O | NaCl 1 M |
|             | TIPS:PS/PFBT                | 3.4      | 30.9                    | 11.6     |
| diF:PS/PFBT | 3.9                         | 21.6     | 6.9                     | 9.1      |
